# Supplementary material for: GluN2B-NMDAR subunit contribution on synaptic plasticity: A phenomenological model for CA3-CA1 synapses
Source: Frontiers journal article supplement (doi:10.3389/fnsyn.2023.1113957), 2023-03-15
Supplement: Data_Sheet_1.pdf [file Data_Sheet_1.pdf]

## 3

5

6

7

8

10

11

## 1 SUPPLEMENTARY DATA

12

18

- 20

35

36

10

41 Stimulation protocols:

- 42 • STDP induction protocol (Wittenberg and Wang, 2006): presynaptic input was paired with a doublet  
43 of postsynaptic action potentials at 1 Hz and 5 Hz frequency, and with a single postsynaptic action  
44 potential at 5 Hz frequency. Temporal difference between pre- and postsynaptic activity was varied  
45 from -100 ms to 100 ms.
- 46 • Frequency-dependent synaptic plasticity induction protocol (Pousinha et al., 2017): presynaptic input  
47 was stimulated using a conditioning protocol that consisted of 100 pulses at 100 Hz (LTP protocol)  
48 or 100 pulses at 1 Hz (LTD protocol). Synaptic plasticity outcome was measured as the change in  
49 the somatic excitatory postsynaptic potential (EPSP). To estimate the EPSP change, a presynaptic  
50 stimulus was delivered before and after the conditioning stimulation, and the resulting ratio between  
51 the maximal values of the resulting EPSPs in soma was calculated.

## 52 1.1 Two-compartment neuron model of CA1 pyramidal neuron

53 The model is composed of somatic and dendritic compartments connected via the coupling conductance  
54 (Pinsky and Rinzel, 1994; Ferguson and Campbell, 2009).

55 Membrane potential in soma  $V_s$  and dendrite  $V_d$  are defined:

$$\begin{aligned}
 C_m \frac{d}{dt} V_s = & -I_{leak,s}(V_s) \\
 & -I_{Na,s}(V_s, h_s) \\
 & -I_{KDR,s}(V_s, n_s) \\
 & -I_{Ca,s}(V_s, s_s) \\
 & -I_{KCa,s}(V_s, [Ca^{2+}]_s, c_s) \\
 & -I_{KAHP,s}(V_s, q_s) \\
 & + \frac{g_c}{p}(V_d - V_s) + \frac{I_s}{p},
 \end{aligned} \tag{S1}$$

$$\begin{aligned}
 C_m \frac{d}{dt} V_d = & -I_{leak,d}(V_d) \\
 & -I_{Ca,d}(V_d, s_d) \\
 & -I_{KCa,d}(V_d, [Ca^{2+}]_d, c_d) \\
 & -I_{KAHP,d}(V_d, q_d) \\
 & + \frac{g_c}{1-p}(V_s - V_d) - \frac{I_{syn}}{1-p},
 \end{aligned} \tag{S2}$$

56 where  $C_m$  is the membrane capacitance per unit area,  $I_{Na,s}$  is inward  $Na^+$  current in soma,  $I_{KDR,s}$  is  
57 outward delayed rectifier  $K^+$  current in soma,  $I_{Ca,s}$  is inward  $Ca^{2+}$  current in soma,  $I_{KCa,s}$  is outward  
58 short-duration voltage and  $Ca^{2+}$  dependent  $K^+$  current in soma,  $I_{KAHP,s}$  is outward long-duration  $Ca^{2+}$ -  
59 dependent AHP  $K^+$  current in soma,  $I_{leak,s}$  is leak current in soma,  $I_{Ca,d}$  is inward  $Ca^{2+}$  current in  
60 dendrite,  $I_{KCa,d}$  is outward short-duration voltage and  $Ca^{2+}$  dependent  $K^+$  current in dendrite,  $I_{KAHP,d}$   
61 is outward long-duration  $Ca^{2+}$ -dependent AHP  $K^+$  current in dendrite,  $I_{leak,d}$  is leak current in dendrite,  
62  $I_s$  is the external current applied to the soma,  $p$  is the proportion of cell area taken by the soma,  $g_c$  is the  
63 coupling conductance between the somatic and dendritic compartments.

64 The ionic currents in Eq.S1 and Eq.S2 are described using Hodgkin-Huxley formalism.

65 Leak current in somatic and dendritic compartments  $I_{leak,\star}(V_\star)$  are equal:

$$I_{leak,\star}(V_\star) = \hat{g}_{leak,\star} (V_\star - E_{leak}), \quad (S3)$$

66 where  $\star \in \{s, d\}$  denotes somatic and dendritic compartments.

67 Inward  $Na^+$  current  $I_{Na,s}(V_s, h_s)$  in soma is responsible for action-potential generation and depends on  
68 the membrane potential in soma  $V_s$ , activation variable  $m_\infty$  and inactivation variable  $h_s$ :

$$I_{Na,s}(V_s, h_s) = \hat{g}_{Na,s} m_\infty^2 h_s (V_s - E_{Na}), \quad (S4)$$

69 Outward delayed rectifier  $K^+$  current  $I_{KDR,s}$  in soma delays action potential generation and depends on  
70  $V_s$  and activation variable  $n_s$ :

$$I_{KDR,s}(V_s, n_s) = \hat{g}_{KDR,s} n_s (V_s - E_K), \quad (S5)$$

71 Inward  $Ca^{2+}$  current  $I_{Ca,\star}$  is modeled in somatic and dendritic compartments, here  $\star \in \{s, d\}$ . This  
72 current is sensitive to the local membrane potential  $V_\star$  and activation variable  $s_\star$ :

$$I_{Ca,\star}(V_\star, s_\star) = \hat{g}_{Ca,\star} s_\star^2 (V_\star - E_{Ca}), \quad (S6)$$

73 The activation of  $KCa$  and  $KAHP$  ion channels depends on the intracellular  $Ca^{2+}$  concentration  
74  $[Ca^{2+}]_\star$ .

75 Outward short-duration voltage and  $Ca^{2+}$  dependent  $K^+$  current  $I_{KCa,\star}$  is present in somatic and  
76 dendritic compartments and proportional to the gating variable  $c_\star$  and saturating function  $\lambda_\star$ :

$$I_{KCa,\star}(V_\star, [Ca^{2+}]_\star, c_\star) = \hat{g}_{KCa,\star} c_\star \lambda_\star (V_\star - E_K), \quad (S7)$$

77 where  $\lambda_\star$  is a function of local  $[Ca^{2+}]_\star$  and is given in Eq.S11.

78 Outward long-duration calcium-dependent AHP potassium current  $I_{KAHP,\star}$  in soma and dendrite depends  
79 on the local membrane potential  $V_\star$  and a local intracellular calcium concentration  $[Ca^{2+}]_\star$ -dependent  
80 gating variable  $q_\star$ :

$$I_{KAHP,\star}(V_\star, q_\star) = \hat{g}_{KAHP,\star} q_\star (V_\star - E_K), \quad (S8)$$

81 In somatic compartment, intracellular calcium concentration  $[Ca^{2+}]_s$  increases due to the  $I_{Ca,s}$  current:

$$\frac{d}{dt}[Ca^{2+}]_s = -\phi \times I_{Ca,s} - \beta_{[Ca^{2+}]}[Ca^{2+}]_s \quad (S9)$$

82 where  $\phi$  is the scaling constant that converts the inward calcium current to the intracellular calcium  
83 concentration  $[Ca^{2+}]_s$ , and  $\beta_{[Ca^{2+}]}$  defines calcium decay via the calcium pump and buffering.

84 In dendritic compartment, NMDAR-mediated calcium current  $I_{Ca,NMDA}$  (Eq.S34) contributes to the  
85 intracellular calcium concentration  $[Ca^{2+}]_d$ :

$$\frac{d}{dt}[Ca^{2+}]_d = -\phi \times (I_{Ca,d} + I_{Ca,NMDA}) - \beta_{[Ca^{2+}]}[Ca^{2+}]_d. \quad (S10)$$

86 Intracellular calcium concentration  $[Ca^{2+}]_\star$  influences the saturation function  $\lambda_\star$  that activates  $I_{KCa,\star}$   
87 (Eq.S7):

$$\lambda_\star = \min(1, [Ca^{2+}]_\star/250). \quad (S11)$$

88 The gating variables  $h_s, n_s, s_\star, c_\star$  are described:

$$\frac{d}{dt}y_\star = \frac{y_\infty(V_\star) - y_\star}{\tau_y(V_\star)}, \quad (S12)$$

89 where  $y \in \{h, n, s, c\}$ .

90 The gating variable  $q_*$  is equal:

$$\frac{d}{dt}q_* = \frac{q_\infty([Ca^{2+}]_*) - q_*}{\tau_q([Ca^{2+}]_*)}, \quad (S13)$$

91 The steady state value and time constant of the gating variables  $h_s, n_s, s_*, c_*$  are defined:

$$y_\infty(V_*) = \frac{\alpha_y(V_*)}{\alpha_y(V_*) + \beta_y(V_*)} \quad (S14)$$

92 and

$$\tau_y(V_*) = \frac{1}{\alpha_y(V_*) + \beta_y(V_*)}. \quad (S15)$$

93 The steady state value and time constant of the gating variable  $q_*$  are defined:

$$q_\infty([Ca^{2+}]_*) = \frac{\alpha_q([Ca^{2+}]_*)}{\alpha_q([Ca^{2+}]_*) + \beta_q([Ca^{2+}]_*)} \quad (S16)$$

94 and

$$\tau_q([Ca^{2+}]_*) = \frac{1}{\alpha_q([Ca^{2+}]_*) + \beta_q([Ca^{2+}]_*)}. \quad (S17)$$

95 Rate constants  $\alpha_y$  and  $\beta_y$  are defined below.

96 Rate constants  $\alpha_m$  and  $\beta_m$  for  $I_{Na,s}$  activation are equal:

$$\alpha_m(V_s) = \frac{0.32 \times (-46.9 - V_s)}{e^{(46.9 - V_s)/4} - 1}, \quad (S18)$$

$$\beta_m(V_s) = \frac{0.28 \times (V_s + 19.9)}{e^{(V_s + 19.9)/5} - 1}, \quad (S19)$$

$$m_\infty = \frac{\alpha_m(V_s)}{\alpha_m(V_s) + \beta_m(V_s)} \quad (S20)$$

97 Rate constants  $\alpha_h$  and  $\beta_h$  for  $I_{Na,s}$  inactivation are equal:

$$\alpha_h(V_s) = 0.128 \times e^{(43.0 - V_s)/18.0}, \quad (S21)$$

$$\beta_h(V_s) = \frac{4.0}{e^{(-20.0 - V_s)/5} + 1}, \quad (S22)$$

98 Rate constants  $\alpha_n$  and  $\beta_n$  for  $I_{KDR,s}$  activation are equal:

$$\alpha_n(V_s) = \frac{0.016 \times (-24.9 - V_s)}{e^{(-24.9 - V_s)/5} - 1}, \quad (S23)$$

$$\alpha_n(V_s) = 0.25 \times e^{(-1.0 - 0.025 \times V_s)/18.0}, \quad (S24)$$

99 Rate constants  $\alpha_q$  and  $\beta_q$  for  $I_{KAHP,*}$  activation depend on  $[Ca^{2+}]_*$ :

$$\alpha_q([Ca^{2+}]_*) = \min(0.00002 \times [Ca^{2+}]_*, 0.01), \quad (S25)$$

$$\beta_q = 0.001, \quad (S26)$$

100 Rate constants  $\alpha_c$  and  $\beta_c$  for  $I_{KCa,*}$  activation also depend on  $[Ca^{2+}]_*$ :

$$\alpha_c(V_*) = \begin{cases} 2 \times e^{(53.5-V_*)/27} & \text{if } V_s > -10mV \\ (e^{(V_*+50)/11} - (53.5+V_*)/27)/18.975 & \text{otherwise} \end{cases} \quad (S27)$$

$$\beta_c(V_*) = \begin{cases} 0 & \text{if } V_s > -10mV \\ 2 \times e^{(-53.5-V_*)/27} - \alpha_c(V_*) & \text{otherwise} \end{cases} \quad (S28)$$

101 Rate constants  $\alpha_s$  and  $\beta_s$  for  $I_{KCa,*}$  are equal:

$$\alpha_s(V_*) = \frac{1.6}{1 + e^{(-0.072 \times V_*) - 1}}, \quad (S29)$$

$$\beta_s(V_*) = \frac{0.02 \times (V_* + 8.9)}{e^{(V_*+8.9)/5} - 1}, \quad (S30)$$

102 The parameters are given in Table S1.

## 103 1.2 AMPAR and NMDAR synapse

104 Synaptic current  $I_{syn}$  consist of AMPAR and NMDAR-mediated currents:

$$I_{syn} = I_{AMPA} + I_{NMDA}. \quad (S31)$$

105 The non-specific current through the AMPAR gated channel is:

$$I_{AMPA} = w(t)g_{AMPA}(t)(V_d - E_{AMPA}), \quad (S32)$$

106 where  $w(t)$  is a synaptic weight defined by Eq. 1.

107 Current through NMDAR gated channel consists of sodium  $I_{Na,NMDA}$  and calcium  $I_{Ca,NMDA}$  currents  
108  $I_{NMDA} = I_{Na,NMDA} + I_{Ca,NMDA}$  that are expressed:

$$I_{Na,NMDA} = 0.94 \times g_{NMDA}(t)(V_d - E_{NMDA}), \quad (S33)$$

$$I_{Ca,NMDA} = 0.06 \times g_{NMDA}(t)(V_d - E_{NMDA}). \quad (S34)$$

109 Synaptic conductances of AMPAR and NMDAR-mediated currents were simulated using a kinetic model  
110 of postsynaptic receptors (Destexhe et al., 1994). Presynaptic activation was modeled as a brief pulse of  
111 glutamate concentration (1 mM during 1 ms) that triggered binding of the transmitter to AMPAR and  
112 NMDAR, and induced transition of receptors from closed to open states.

113 AMPAR synaptic conductance is described (Destexhe et al., 1994):

$$g_{AMPA} = (R_{on_{AMPA}} - R_{off_{AMPA}})\hat{g}_{AMPA}, \quad (S35)$$

114 where  $R_{on_{AMPA}}$  and  $R_{off_{AMPA}}$  are the fraction of open and closed AMPAR,  $\hat{g}_{AMPA}$  is the maximal  
115 AMPAR conductance.

116  $R_{on_{AMPA}}$  and  $R_{off_{AMPA}}$  and  $R_{inf_{AMPA}}$  are equal:

$$\tau_{AMPA} \frac{d}{dt} R_{on_{AMPA}} = (R_{inf_{AMPA}} - R_{on_{AMPA}}), \quad (S36)$$

$$\frac{d}{dt} R_{off_{AMPA}} = -\beta_{AMPA} R_{off_{AMPA}}, \quad (S37)$$

117 and

$$R_{inf_{AMPA}} = \frac{\alpha_{AMPA}}{\alpha_{AMPA} + \beta_{AMPA}}, \quad (S38)$$

118 where  $\alpha_{AMPA}$  and  $\beta_{AMPA}$  are forward and backward binding rates are of AMPAR.

119 Time constant  $\tau_{AMPA}$  of AMPAR activation is defined:

$$\tau_{AMPA} = \frac{1}{\alpha_{AMPA} + \beta_{AMPA}}, \quad (S39)$$

120 The parameters of AMPAR and NMDAR are given in Table S2.

## 2 SUPPLEMENTARY TABLES

**Table S1.** Parameters of a two-compartmental model of CA1 pyramidal neuron

| Parameter                                                          | Value | Unit               | Description                                                     | Ref                          |
|--------------------------------------------------------------------|-------|--------------------|-----------------------------------------------------------------|------------------------------|
| Parameters of the two-compartmental model of CA1 pyramidal neuron. |       |                    |                                                                 |                              |
| $V_{leak,s}$                                                       | -65   | mV                 | Leak reversal potential in soma                                 | Pinsky and Rinzel (1994)     |
| $V_{leak,d}$                                                       | -65   | mV                 | Leak reversal potential in dendrite                             | Pinsky and Rinzel (1994)     |
| $C_m$                                                              | 3     | $\mu F/cm^2$       | Membrane capacitance                                            | Pinsky and Rinzel (1994)     |
| $\hat{g}_{leak,s}$                                                 | 0.1   | mV                 | Maximum leakage conductance in soma                             | Pinsky and Rinzel (1994)     |
| $\hat{g}_{leak,d}$                                                 | 0.1   | $\mu F/cm^2$       | Maximum leakage conductance in dendrite                         | Pinsky and Rinzel (1994)     |
| $\hat{g}_{Na,s}$                                                   | 30    | $\mu F/cm^2$       | Maximum conductance of $I_{Na,s}$ in soma                       | Pinsky and Rinzel (1994)     |
| $\hat{g}_{KDR,s}$                                                  | 17    | $\mu F/cm^2$       | Maximum conductance of $I_{KDR,s}$ in soma                      | Ferguson and Campbell (2009) |
| $\hat{g}_{Ca,s}$                                                   | 6     | $\mu F/cm^2$       | Maximum conductance of $I_{Ca,s}$ in soma                       | Ferguson and Campbell (2009) |
| $\hat{g}_{KCa,s}$                                                  | 15    | $\mu F/cm^2$       | Maximum conductance of $I_{KCa,s}$ in soma                      | Pinsky and Rinzel (1994)     |
| $\hat{g}_{KAHP,s}$                                                 | 0.8   | $\mu F/cm^2$       | Maximum conductance of $I_{KAHP,s}$                             | Ferguson and Campbell (2009) |
| $\hat{g}_{Ca,d}$                                                   | 5     | $\mu F/cm^2$       | Maximum conductance of $I_{Ca,d}$                               | Pinsky and Rinzel (1994)     |
| $\hat{g}_{KCa,d}$                                                  | 5     | $\mu F/cm^2$       | Maximum conductance of $I_{KCa,d}$ in dendrite                  | Pinsky and Rinzel (1994)     |
| $\hat{g}_{KAHP,d}$                                                 | 0.8   | $\mu F/cm^2$       | Maximum conductance of $I_{KAHP,d}$ in dendrite                 | Pinsky and Rinzel (1994)     |
| $g_c$                                                              | 1.5   | mS/cm <sup>2</sup> | Coupling conductance between somatic and dendritic compartments | Pinsky and Rinzel (1994)     |
| $p$                                                                | 0.5   | —                  | Proportion of the cell area taken by soma                       | Pinsky and Rinzel (1994)     |
| $E_{Na}$                                                           | 60    | mV                 | Reversal potential for $Na^+$                                   | Pinsky and Rinzel (1994)     |
| $E_{Ca}$                                                           | 80    | mV                 | Reversal potential for $Ca^{2+}$                                | Pinsky and Rinzel (1994)     |
| $E_K$                                                              | -75   | mV                 | Reversal potential for $K^+$                                    | Pinsky and Rinzel (1994)     |
| $I_s$                                                              | 20    | $\mu A/cm^2$       | Stimulus current pulse injected in soma for STDP protocol 5ms   | adjusted                     |

**Table S2.** Parameters of NMDAR and AMPAR synapses. Parameter values are presented for synapses in two-compartmental model and multicompartmental model (in parentheses, if different) of CA1 pyramidal neuron

| Parameter               | Value                                        | Unit | Description                    | Ref                     |
|-------------------------|----------------------------------------------|------|--------------------------------|-------------------------|
| AMPA and NMDA receptors |                                              |      |                                |                         |
| $\alpha_{GluN2A}$       | 0.5                                          | /ms  | Forward binding rate of AMPAR  | (Destexhe et al., 1994) |
| $\beta_{AMPA}$          | 0.19                                         | /ms  | Backward binding rate of AMPAR | (Destexhe et al., 1994) |
| $\hat{g}_{AMPA}$        | $1 \times 10^{-2}$<br>( $8 \times 10^{-5}$ ) | nS   | Maximal AMPAR conductance      | adjusted                |
| $E_{AMPA}$              | 0                                            | mV   | AMPA reversal potential        | (Destexhe et al., 1994) |
| $E_{NMDA}$              | 0                                            | mV   | NMDA reversal potential        | (Destexhe et al., 1994) |

122

## REFERENCES

- 123 Bezaire, M. J., Raikov, I., Burk, K., Vyas, D., and Soltesz, I. (2016). Interneuronal mechanisms  
124 of hippocampal theta oscillations in a full-scale model of the rodent CA1 circuit. *eLife* 5, e18566.  
125 doi:10.7554/eLife.18566
- 126 Destexhe, A., Mainen, Z. F., and Sejnowski, T. J. (1994). Synthesis of models for excitable  
127 membranes, synaptic transmission and neuromodulation using a common kinetic formalism. *Journal of*  
128 *Computational Neuroscience* 1, 195–230. doi:10.1007/BF00961734
- 129 Ferguson, K. and Campbell, S. (2009). A Two Compartment Model of a CA1 Pyramidal Neuron. *The*  
130 *Canadian Applied Mathematics Quarterly* 17
- 131 Gasparini, S., Migliore, M., and Magee, J. C. (2004). On the Initiation and Propagation of Dendritic Spikes  
132 in CA1 Pyramidal Neurons. *Journal of Neuroscience* 24, 11046–11056. doi:10.1523/JNEUROSCI.  
133 2520-04.2004
- 134 Migliore, R., Lupascu, C. A., Bologna, L. L., Romani, A., Courcol, J.-D., Antonel, S., et al. (2018).  
135 The physiological variability of channel density in hippocampal CA1 pyramidal cells and interneurons  
136 explored using a unified data-driven modeling workflow. *PLOS Computational Biology* 14, e1006423.  
137 doi:10.1371/journal.pcbi.1006423
- 138 Pinsky, P. F. and Rinzel, J. (1994). Intrinsic and network rhythmogenesis in a reduced Traub model for  
139 CA3 neurons. *Journal of Computational Neuroscience* 1, 39–60. doi:10.1007/BF00962717
- 140 Pousinha, P. A., Mouska, X., Raymond, E. F., Gwizdek, C., Dhib, G., Poupon, G., et al. (2017).  
141 Physiological and pathophysiological control of synaptic GluN2B-NMDA receptors by the C-terminal  
142 domain of amyloid precursor protein. *eLife* 6. doi:10.7554/eLife.25659
- 143 Wittenberg, G. M. and Wang, S. S.-H. (2006). Malleability of Spike-Timing-Dependent Plasticity at the  
144 CA3-CA1 Synapse. *Journal of Neuroscience* 26, 6610–6617. doi:10.1523/JNEUROSCI.5388-05.2006
